# Supplementary material for: Structural Assignment of the Product Ion Generated from a Natural Ciguatoxin-3C Congener, 51-Hydroxyciguatoxin-3C, and Discovery of Distinguishable Signals in Congeners Bearing the 51-Hydroxy Group
Source: MDPI journal article supplement (doi:10.3390/toxins16020089), 2024-02-06
Supplement: s1 [file s1]

---

# **Supplementary materials: Structural Assignment of the Product Ion Generated from a Natural Ciguatoxin-3C Congener, 51-Hydroxyciguatoxin-3C, and Discovery of Distinguishable Signals in Congeners Bearing the 51-Hydroxy Group**

| Formula   | Mass              | Compound | Description | C         | H        | D        | F         | O         |                   |               |               |                     |
|-----------|-------------------|----------|-------------|-----------|----------|----------|-----------|-----------|-------------------|---------------|---------------|---------------------|
|           |                   |          |             | 12.000065 | 1.007825 | 2.014102 | 18.998403 | 15.994915 |                   |               |               |                     |
|           | theoretical value |          |             |           |          |          |           |           | $[M-H]^+/[M+H]^+$ | $m/z$ (calcd) | $m/z$ (found) | mass accuracy (ppm) |
| M         |                   |          |             |           |          |          |           |           |                   |               |               |                     |
| C57H82O17 | 1038.55520        |          |             | 57        | 82       |          |           | 17        | 1.007825          | 1039.5630     | 1039.5647     | 1.6                 |
| C57H80O18 | 1020.54464        | B16      |             | 57        | 80       |          |           | 16        | 1.007825          | 1021.5525     | 1021.5508     | -1.6                |
| C57H78O15 | 1002.53407        | B17      |             | 57        | 78       |          |           | 15        | 1.007825          | 1003.5419     | 1003.5413     | -0.6                |
| C57H76O14 | 984.52351         | B18      |             | 57        | 76       |          |           | 14        | 1.007825          | 985.5313      | 985.5294      | -2.0                |
| C55H78O15 | 978.53407         | A9       |             | 55        | 78       |          |           | 15        | 1.007825          | 979.5419      | 979.5385      | -3.5                |
| C57H74O13 | 966.51294         | B19      |             | 57        | 74       |          |           | 13        | 1.007825          | 967.5208      | 967.5161      | -4.8                |
| C55H76O14 | 960.52351         | A10      |             | 55        | 76       |          |           | 14        | 1.007825          | 961.5313      | 961.5296      | -1.8                |
| C57H72O12 | 948.50238         | B20      |             | 57        | 72       |          |           | 12        | 1.007825          | 949.5102      | 949.5080      | -2.3                |
| C55H74O13 | 942.51294         | A11      |             | 55        | 74       |          |           | 13        | 1.007825          | 943.5208      | 943.5180      | -2.9                |
| C57H70O11 | 930.49181         | B21      |             | 57        | 70       |          |           | 11        | 1.007825          | 931.4996      | 931.4953      | -4.7                |
| C55H72O12 | 924.50238         | A12      |             | 55        | 72       |          |           | 12        | 1.007825          | 925.5102      | 925.5189      | 9.4                 |
| C57H68O10 | 912.48125         | B22      |             | 57        | 68       |          |           | 10        | 1.007825          | 913.4891      | 913.4797      | -10.3               |
| C57H68O9  | 906.47656         | A1       |             | 51        | 70       |          |           | 14        | 1.007825          | 907.4844      | 907.4851      | 0.8                 |
| C51H70O14 | 894.47088         | B23      |             | 57        | 66       |          |           | 9         | 1.007825          | 895.4785      | 895.4706      | -8.8                |
| C51H68O13 | 888.46599         | A2       |             | 51        | 68       |          |           | 13        | 1.007825          | 889.4738      | 889.4670      | -7.7                |
| C51H66O12 | 870.45543         | A3       |             | 51        | 66       |          |           | 12        | 1.007825          | 871.4633      | 871.4534      | -11.3               |
| C51H64O11 | 852.44486         | A4       |             | 51        | 64       |          |           | 11        | 1.007825          | 853.4527      | 853.4475      | -6.1                |
| C31H40O8  | 540.27232         | A5       |             | 31        | 40       |          |           | 8         | 1.007825          | 541.2801      | 541.2794      | -1.4                |
| C31H38O7  | 522.26175         | A6       |             | 31        | 38       |          |           | 7         | 1.007825          | 523.2696      | 523.2692      | -0.7                |
| C28H44O8  | 508.30362         | B1       |             | 28        | 44       |          |           | 8         | 1.007825          | 509.3114      | 509.3077      | -7.3                |
| C31H36O6  | 504.25119         | A7       |             | 31        | 36       |          |           | 6         | 1.007825          | 505.2590      | 505.2612      | 4.3                 |
| C28H42O7  | 490.29305         | B2       |             | 28        | 42       |          |           | 7         | 1.007825          | 491.3009      | 491.3017      | 1.7                 |
| C28H40O8  | 480.27232         | B6       |             | 28        | 40       |          |           | 8         | 1.007825          | 481.2801      | 481.2808      | 1.4                 |
| C28H40O6  | 472.28249         | B3       |             | 28        | 40       |          |           | 6         | 1.007825          | 473.2903      | 473.2848      | -11.7               |
| C28H38O7  | 462.26175         | B7       |             | 28        | 38       |          |           | 7         | 1.007825          | 463.2696      | 463.2709      | 2.9                 |
| C28H38O5  | 454.27192         | B4       |             | 28        | 38       |          |           | 5         | 1.007825          | 455.2797      | 455.2749      | -10.7               |
| C28H36O6  | 444.25119         | B8       |             | 28        | 36       |          |           | 6         | 1.007825          | 445.2590      | 445.2574      | -3.6                |
| C24H38O7  | 438.26175         | B24      |             | 24        | 38       |          |           | 7         | 1.007825          | 439.2696      | 439.2664      | -2.7                |
| C28H36O4  | 436.26136         | B5       |             | 28        | 36       |          |           | 4         | 1.007825          | 437.2692      | 437.2663      | -8.9                |
| C26H34O5  | 426.24062         | B9       |             | 26        | 34       |          |           | 5         | 1.007825          | 427.2484      | 427.2462      | -5.3                |
| C24H36O6  | 420.25119         | B25      |             | 24        | 36       |          |           | 6         | 1.007825          | 421.2590      | 421.2626      | 8.5                 |
| C26H32O4  | 408.23006         | B10      |             | 26        | 32       |          |           | 4         | 1.007825          | 409.2379      | 409.2342      | -9.0                |
| C24H34O5  | 402.24062         | B26      |             | 24        | 34       |          |           | 5         | 1.007825          | 403.2484      | 403.2456      | -7.1                |
| C26H30O3  | 390.21949         | B11      |             | 26        | 30       |          |           | 3         | 1.007825          | 391.2273      | 391.2247      | -6.7                |
| C9H14O3   | 170.09429         | B12      |             | 9         | 14       |          |           | 3         | 1.007825          | 171.1021      | 171.1038      | 9.8                 |
| C9H12O2   | 152.08373         | B13      |             | 9         | 12       |          |           | 2         | 1.007825          | 153.0916      | 153.0920      | 2.9                 |
| C9H12O2   | 148.08882         | B28      |             | 10        | 12       |          |           | 1         | 1.007825          | 149.0966      | 149.0961      | -3.6                |
| C8H12O2   | 140.08373         | B14      |             | 8         | 12       |          |           | 2         | 1.007825          | 141.0916      | 141.0904      | -8.2                |
| C8H12O2   | 134.07316         | B27      |             | 9         | 10       |          |           | 1         | 1.007825          | 135.0810      | 135.0794      | -11.8               |
| C8H10O    | 122.07316         | B15      |             | 8         | 10       |          |           | 1         | 1.007825          | 123.0810      | 123.0800      | -9.0                |
| C8H10O    | 114.06808         | B29      |             | 6         | 10       |          |           | 2         | 1.007825          | 115.0759      | 115.0756      | -2.6                |
| C7H8O     | 108.05751         | A8       |             | 7         | 8        |          |           | 1         | 1.007825          | 109.0653      | 109.0652      | -1.3                |

Table S1. Assignment of ions contained in product ion spectra from  $[M+H]^+$  of 51-hydroxy CTX3C.

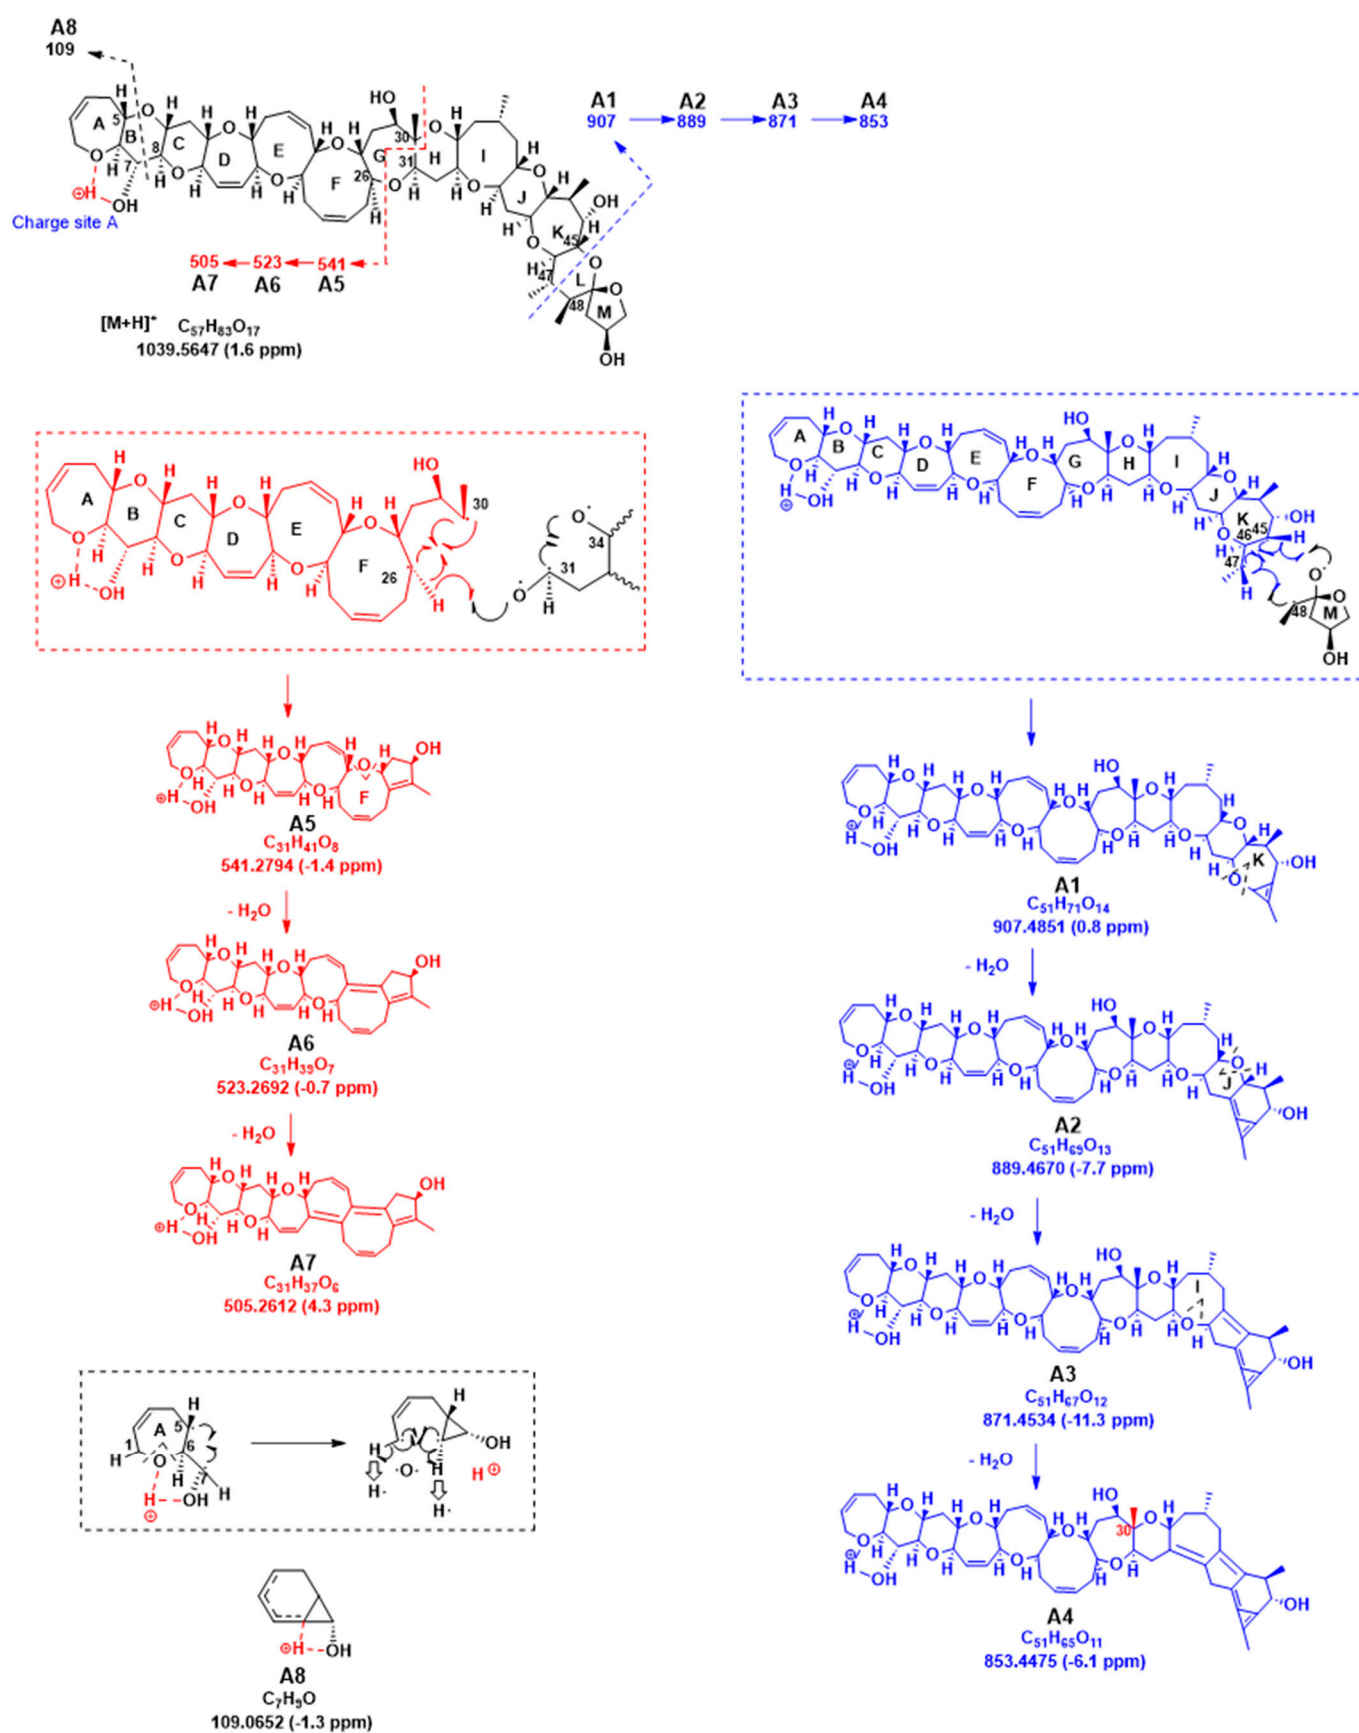

**Figure S1.** Structures of product ions induced by 51-hydroxy CTX3C at charge site A.

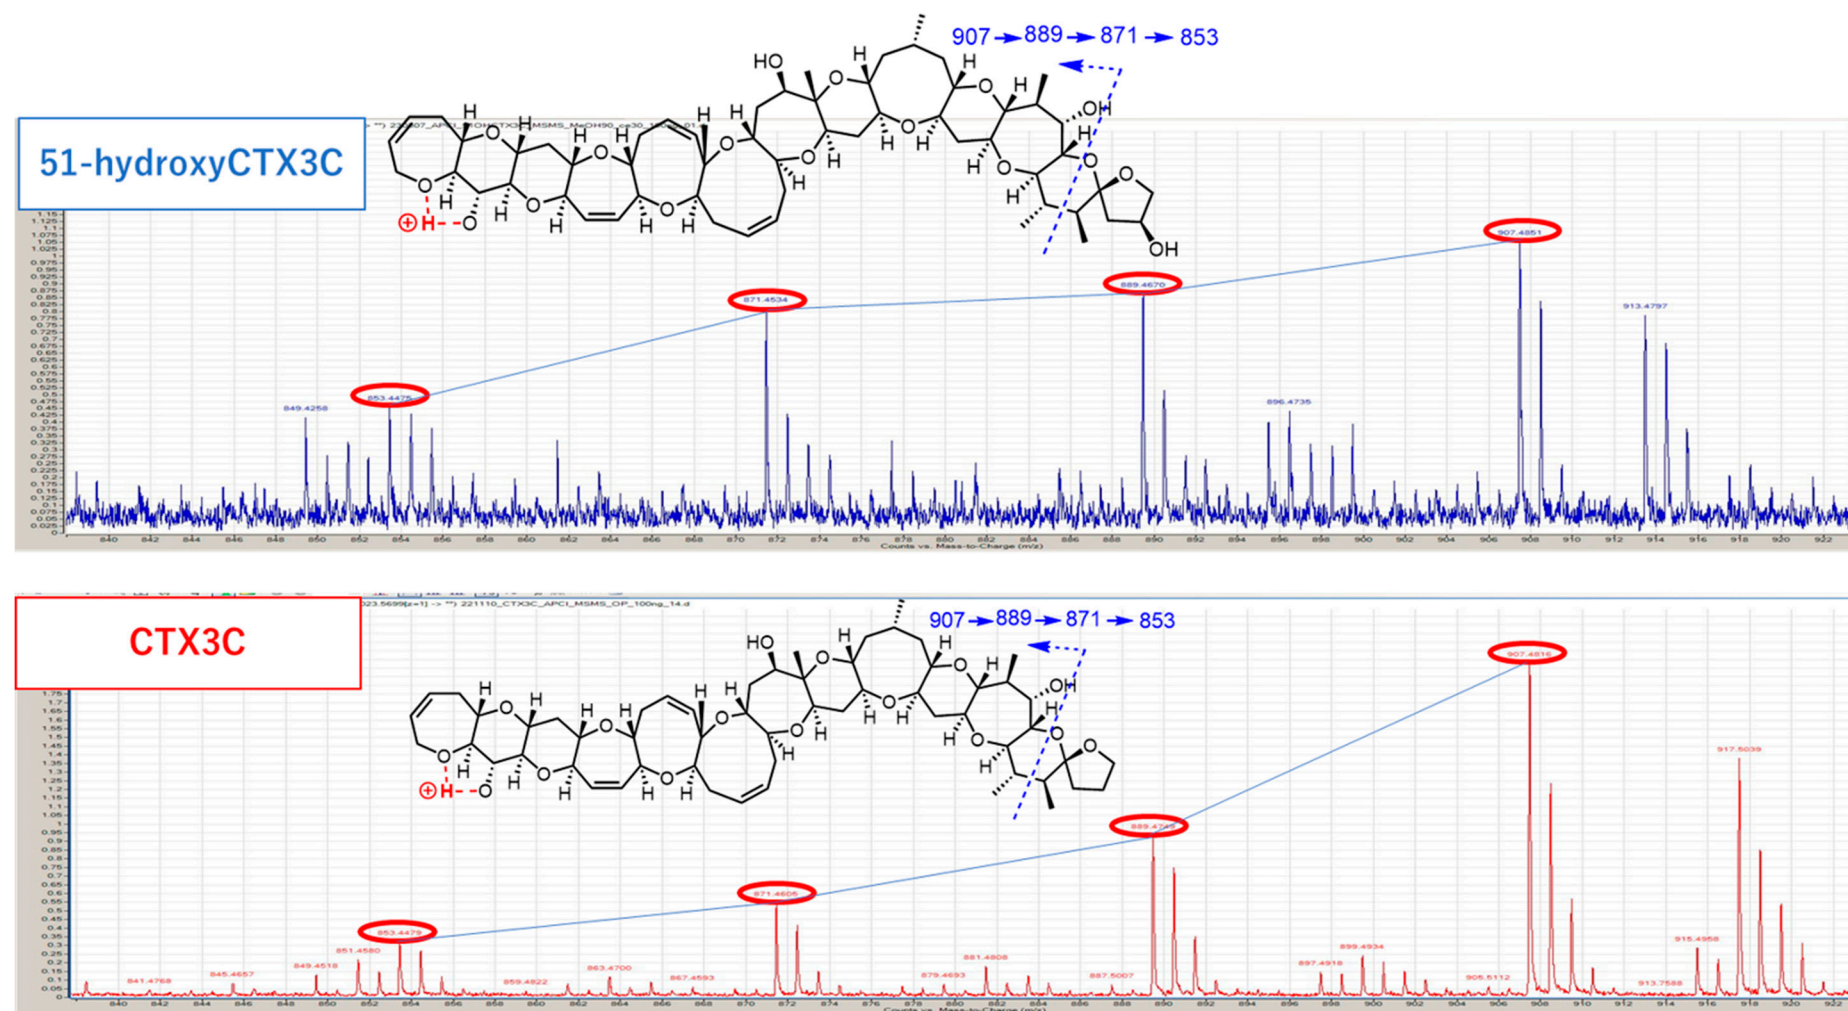

Figure S2. MS/MS product ion spectrum (1) of 51-hydroxy CTX3C [M+H]<sup>+</sup> as a precursor ion (A) and CTX3C [M+H]<sup>+</sup> as a precursor ion (B).



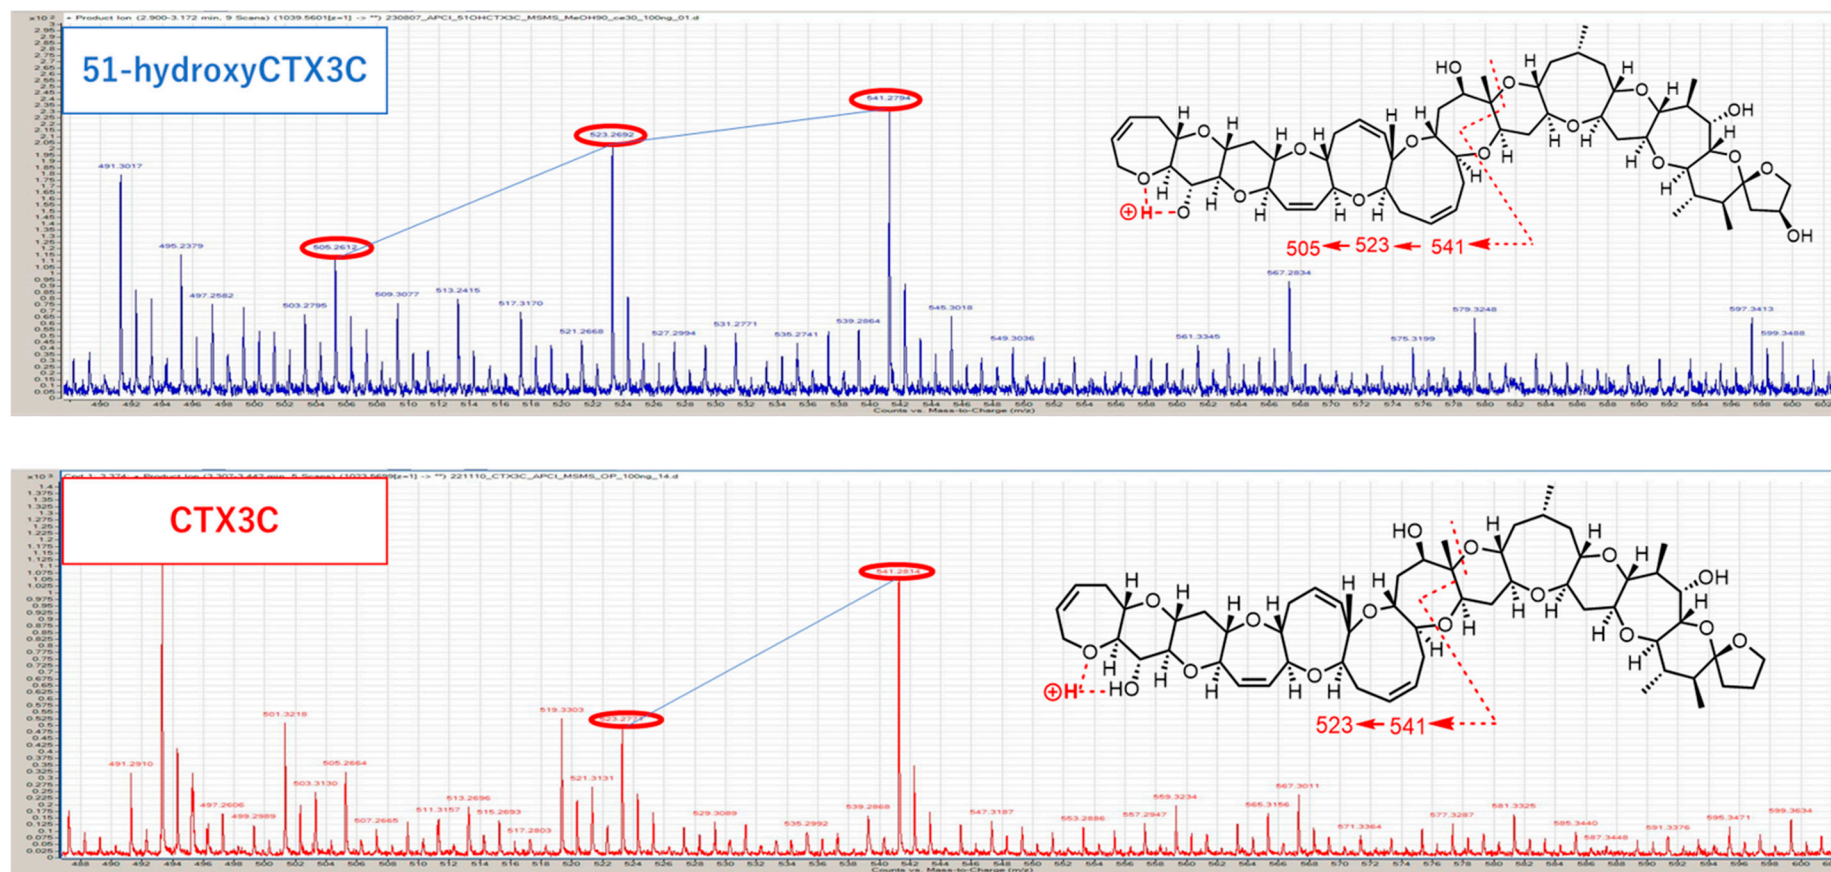

**Figure S3.** MS/MS product ion spectrum (2) of 51-hydroxy CTX3C  $[M+H]^+$  as a precursor ion (A) and CTX3C  $[M+H]^+$  as a precursor ion (B).

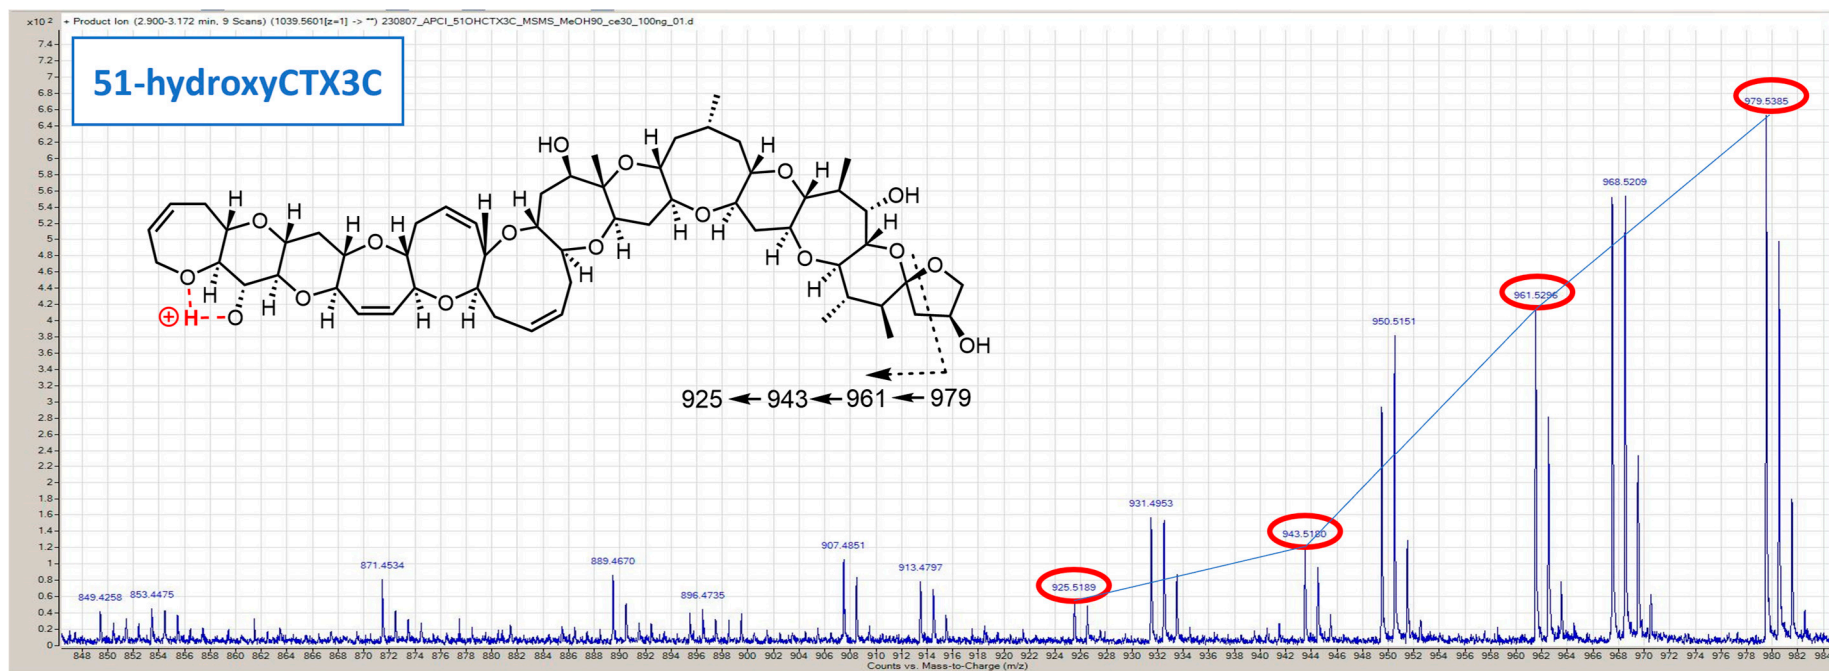

**Figure S4.** MS/MS product ion spectrum (3) of 51-hydroxy CTX3C [M+H]<sup>+</sup> as a precursor ion (m/z 850-980).

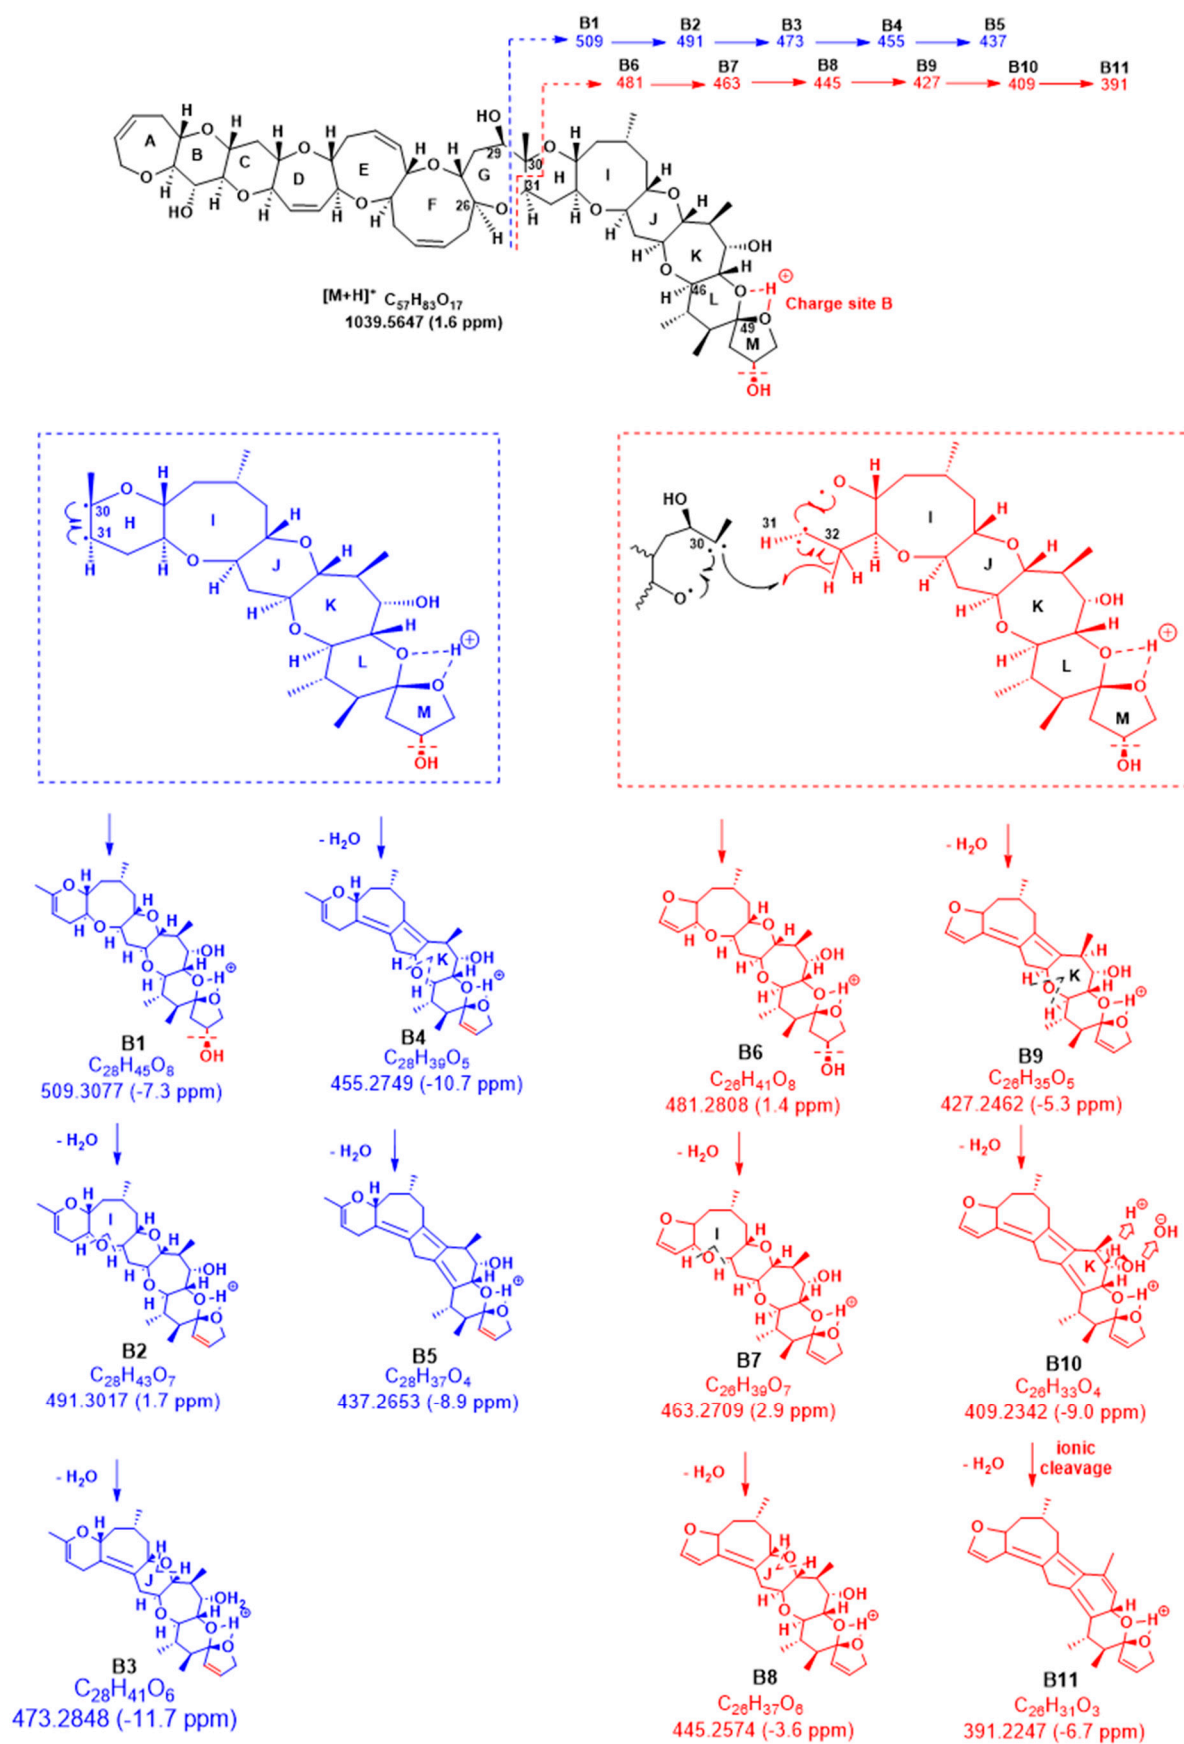

**Figure S5.** Structures of product ions induced by 51-hydroxy CTX3C at charge site B (1).

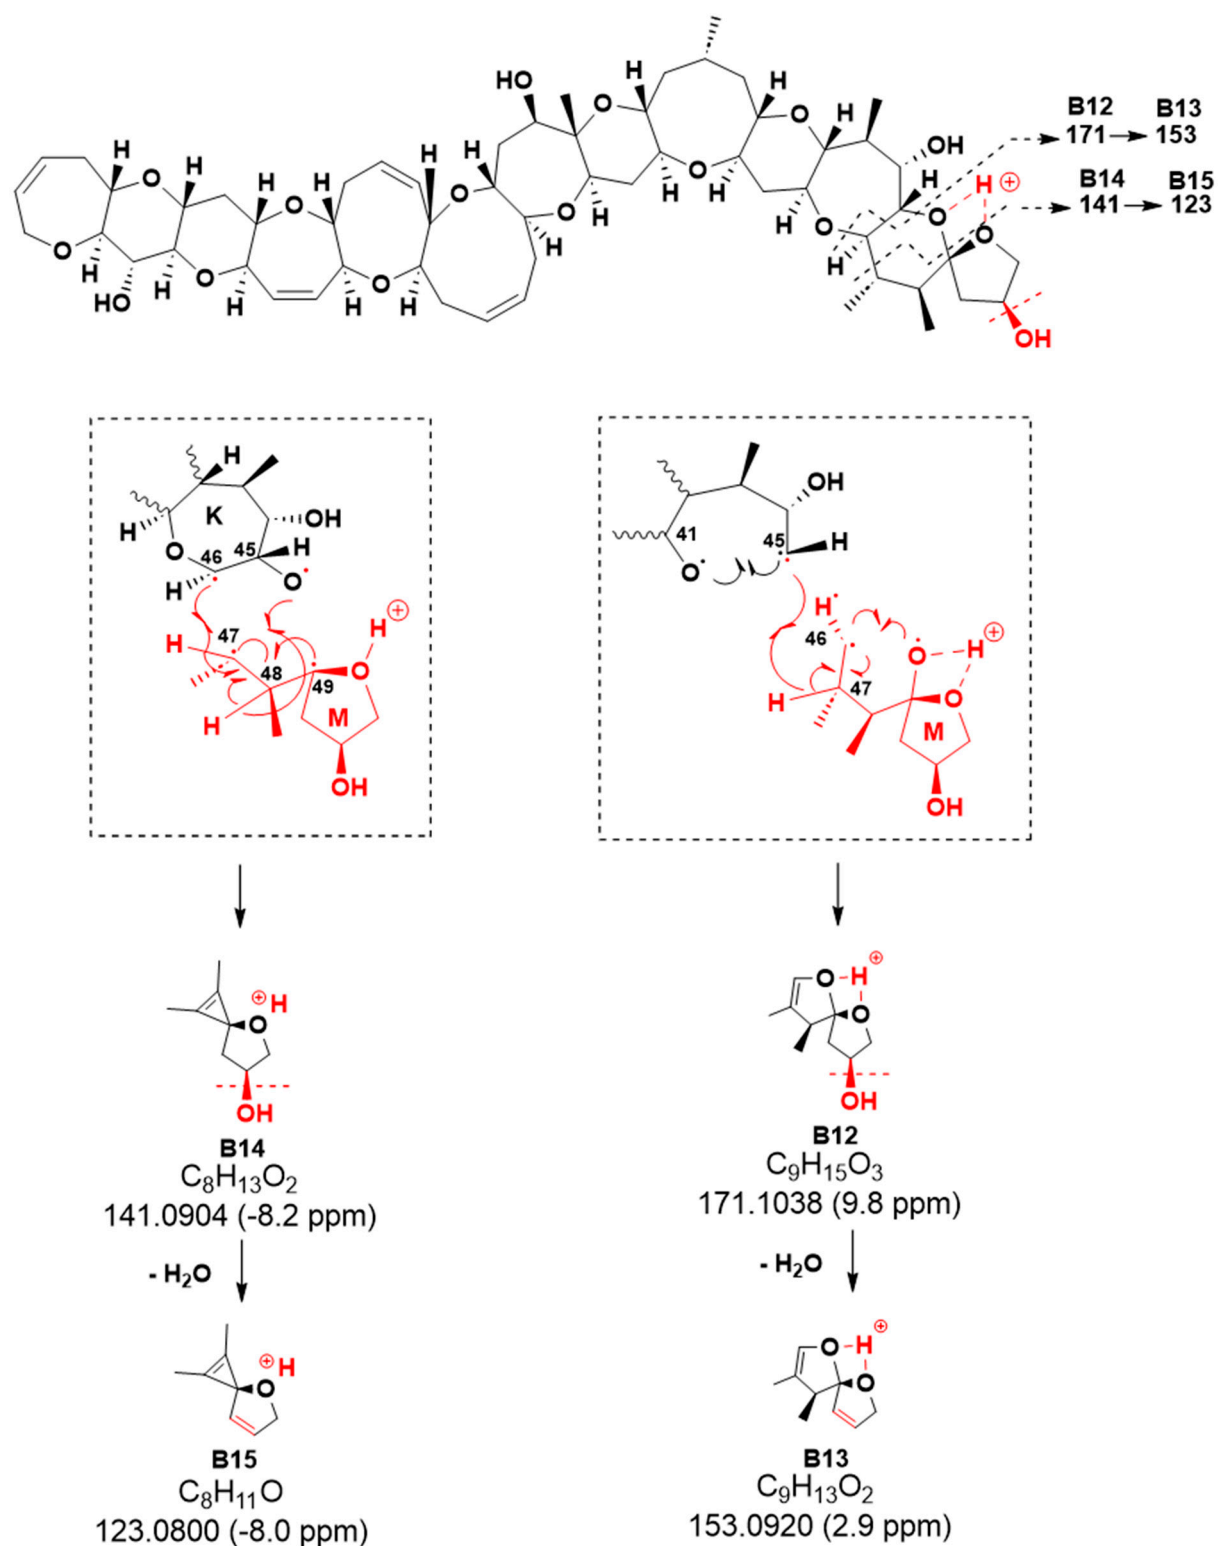

**Figure S6.** Structures of product ions induced by 51-hydroxy CTX3C at charge site B (2).



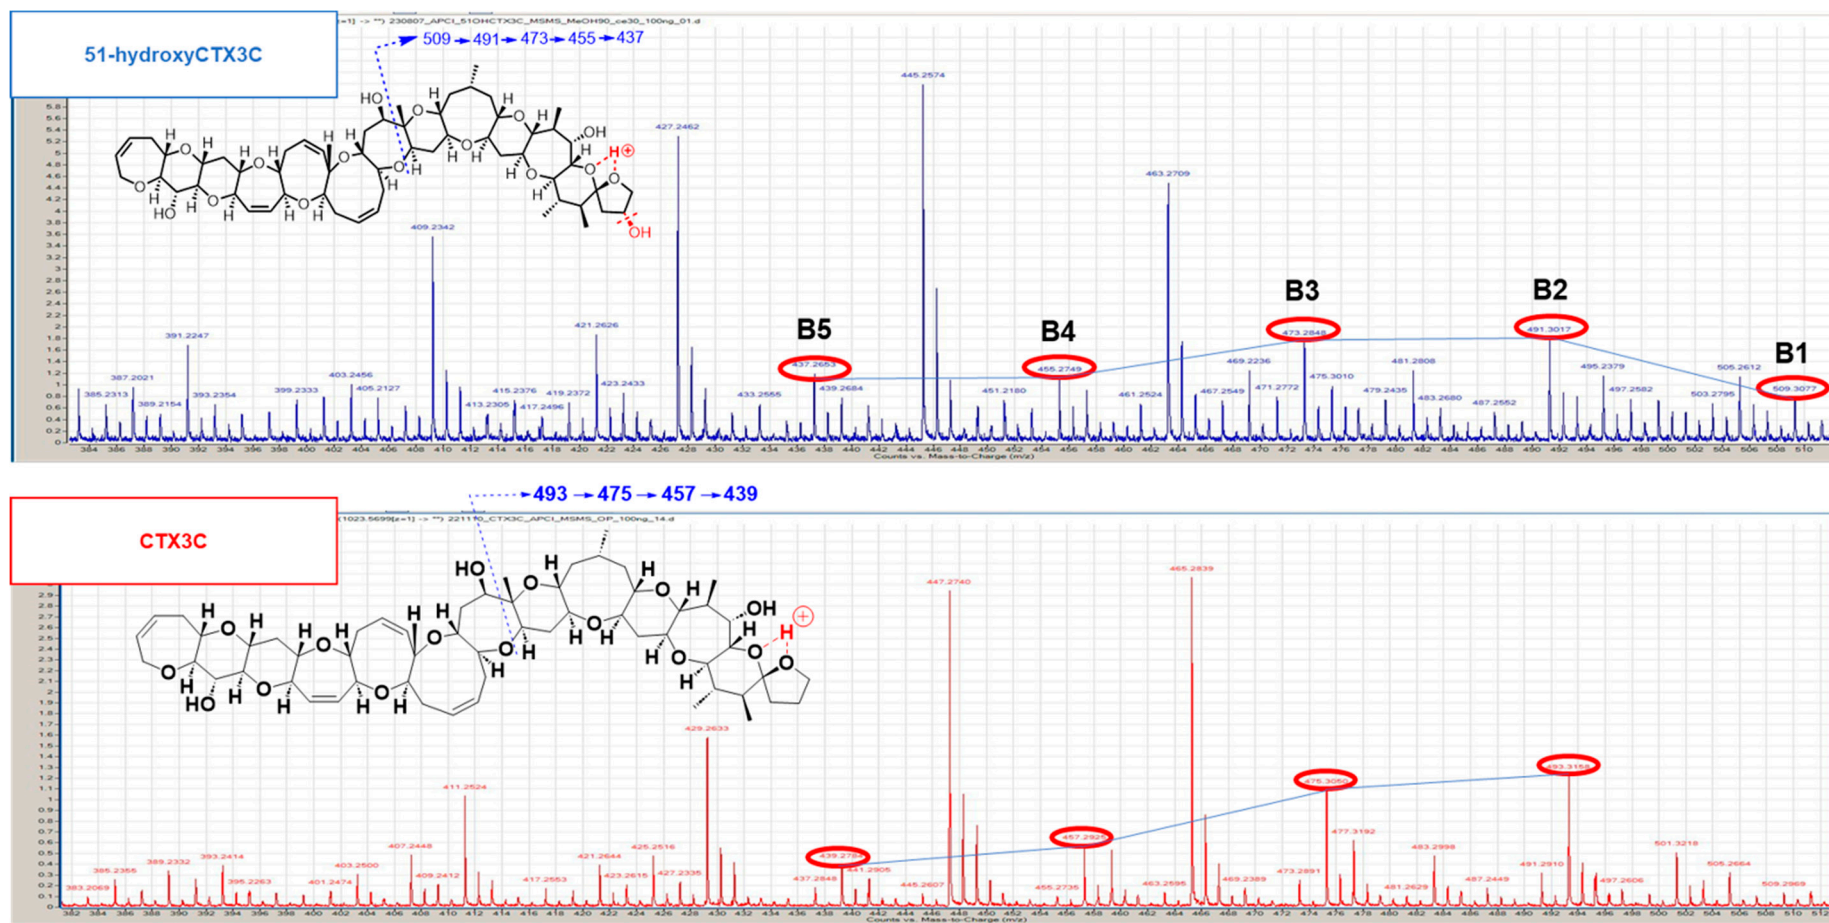

**Figure S7.** MS/MS product ion spectrum (4) of 51-hydroxy CTX3C  $[M+H]^+$  as a precursor ion (A) and CTX3C  $[M+H]^+$  as a precursor ion (B).



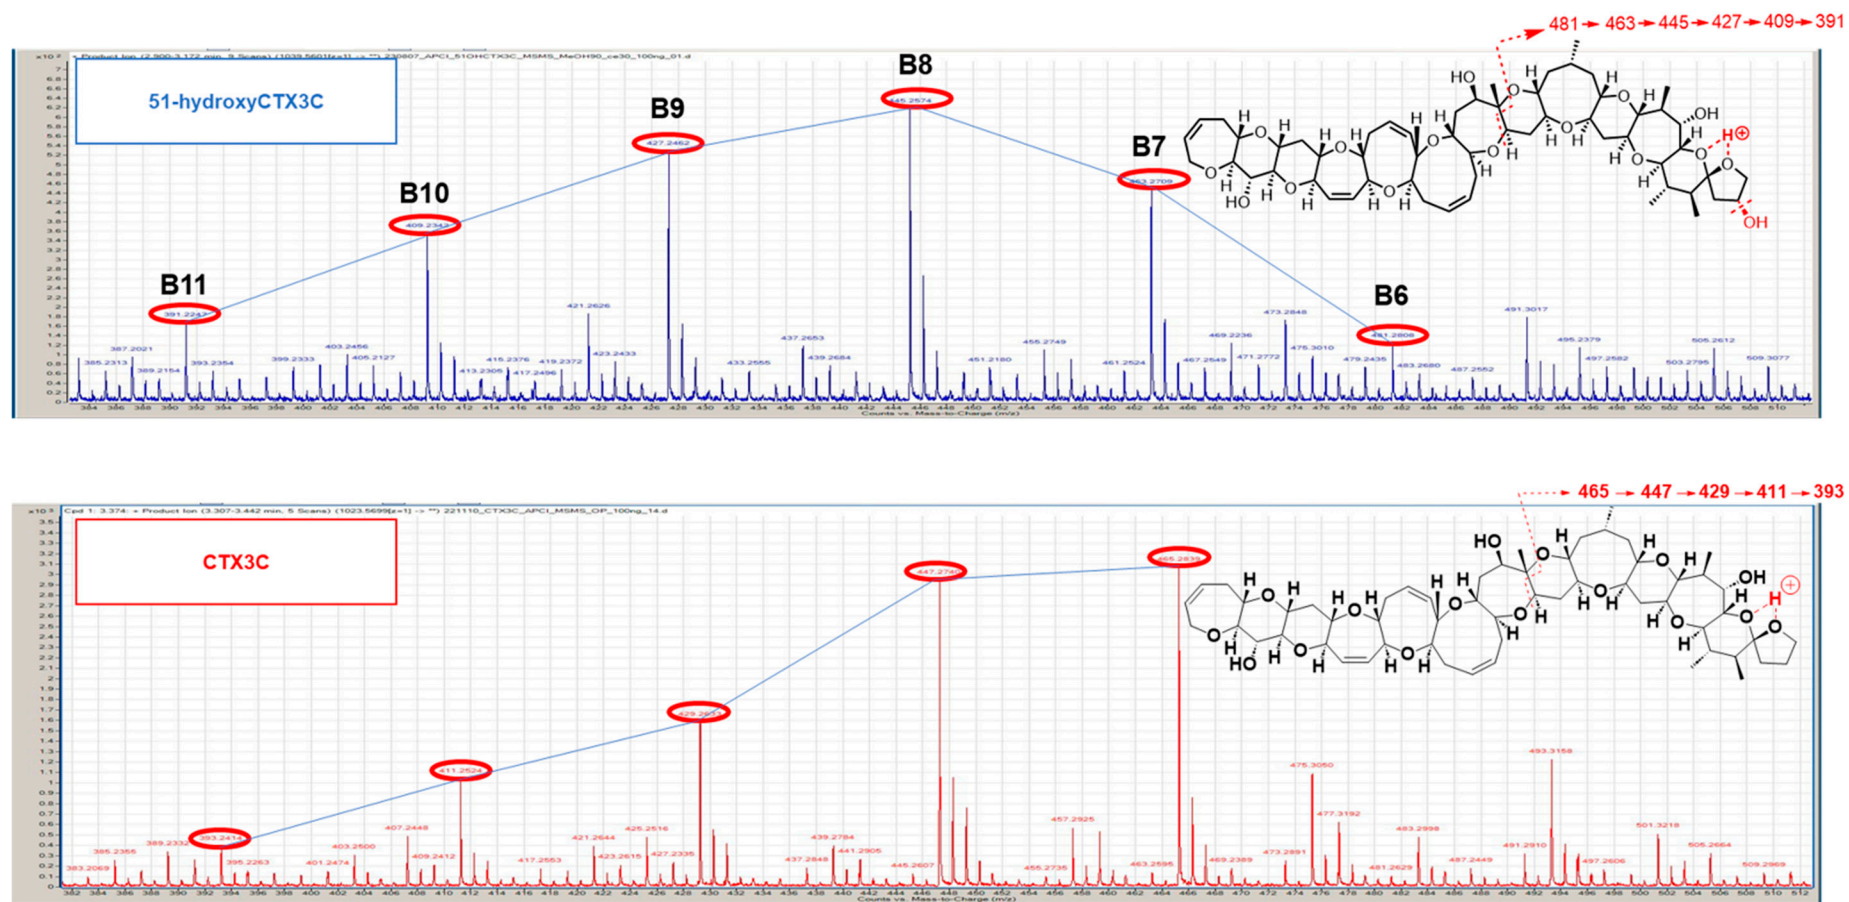

**Figure S8.** MS/MS product ion spectrum (5) of 51-hydroxy CTX3C [M+H]<sup>+</sup> as a precursor ion (A) and CTX3C [M+H]<sup>+</sup> as a precursor ion (B).

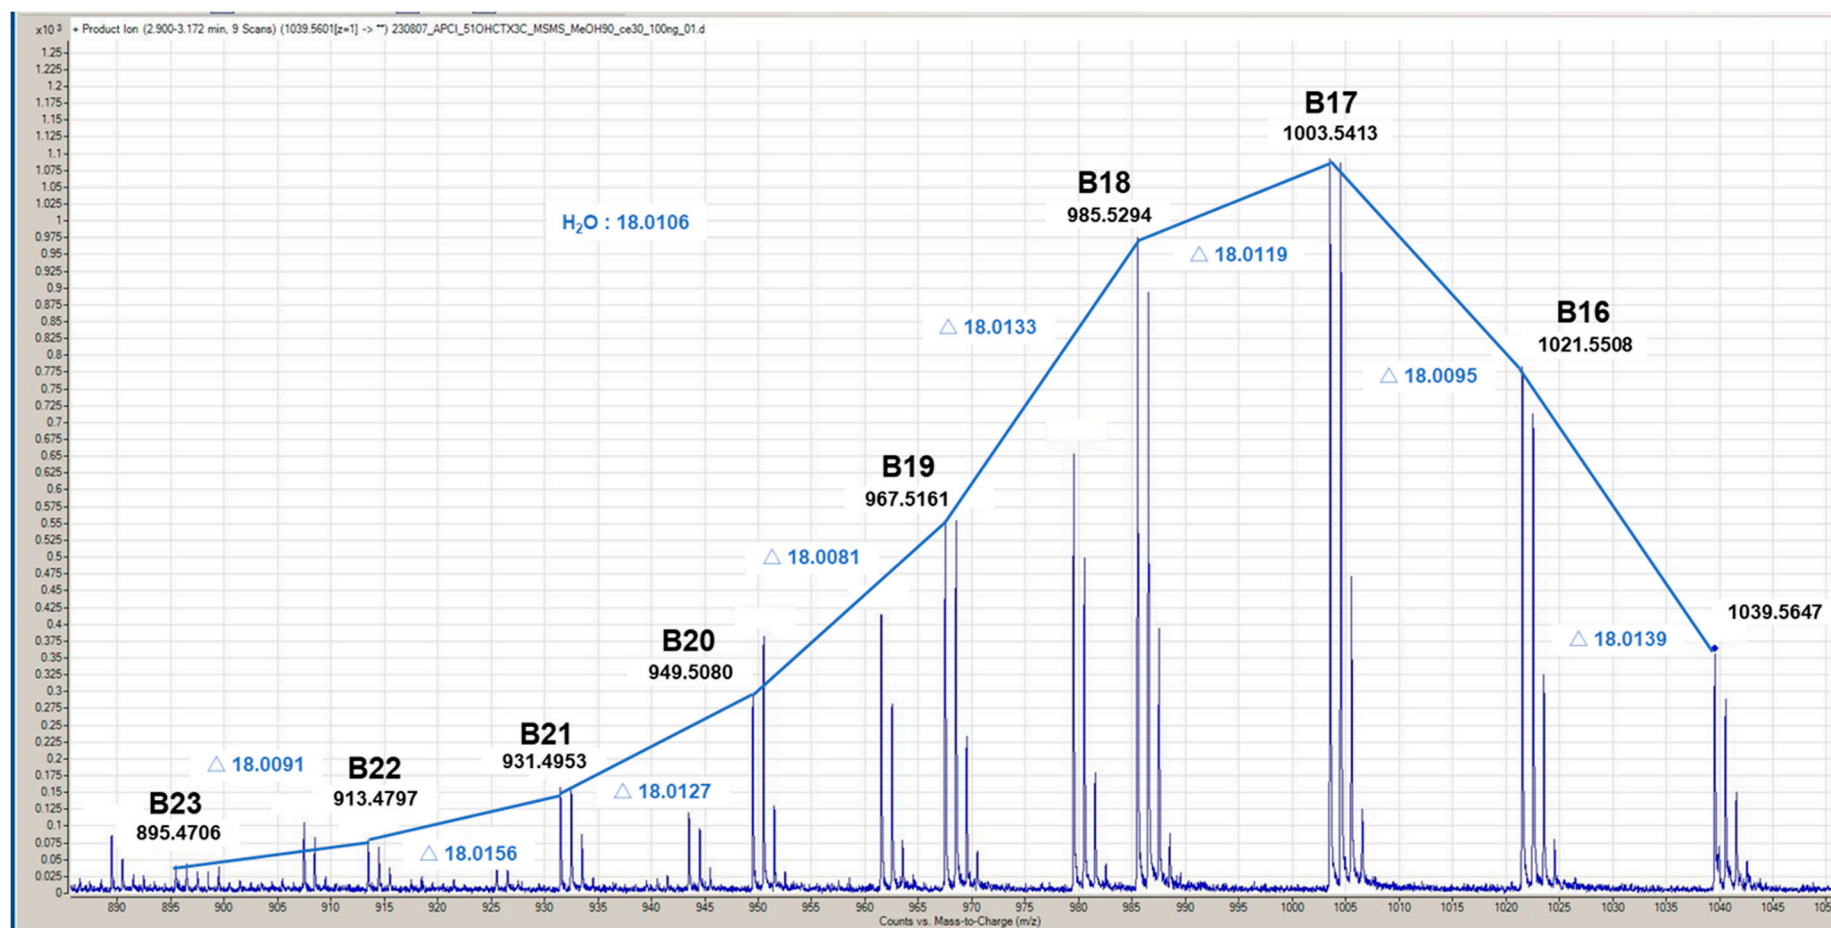

Figure S9. MS/MS product ion spectrum (6) of 51-hydroxy CTX3C [M+H]<sup>+</sup> as a precursor ion (m/z 890-1050).

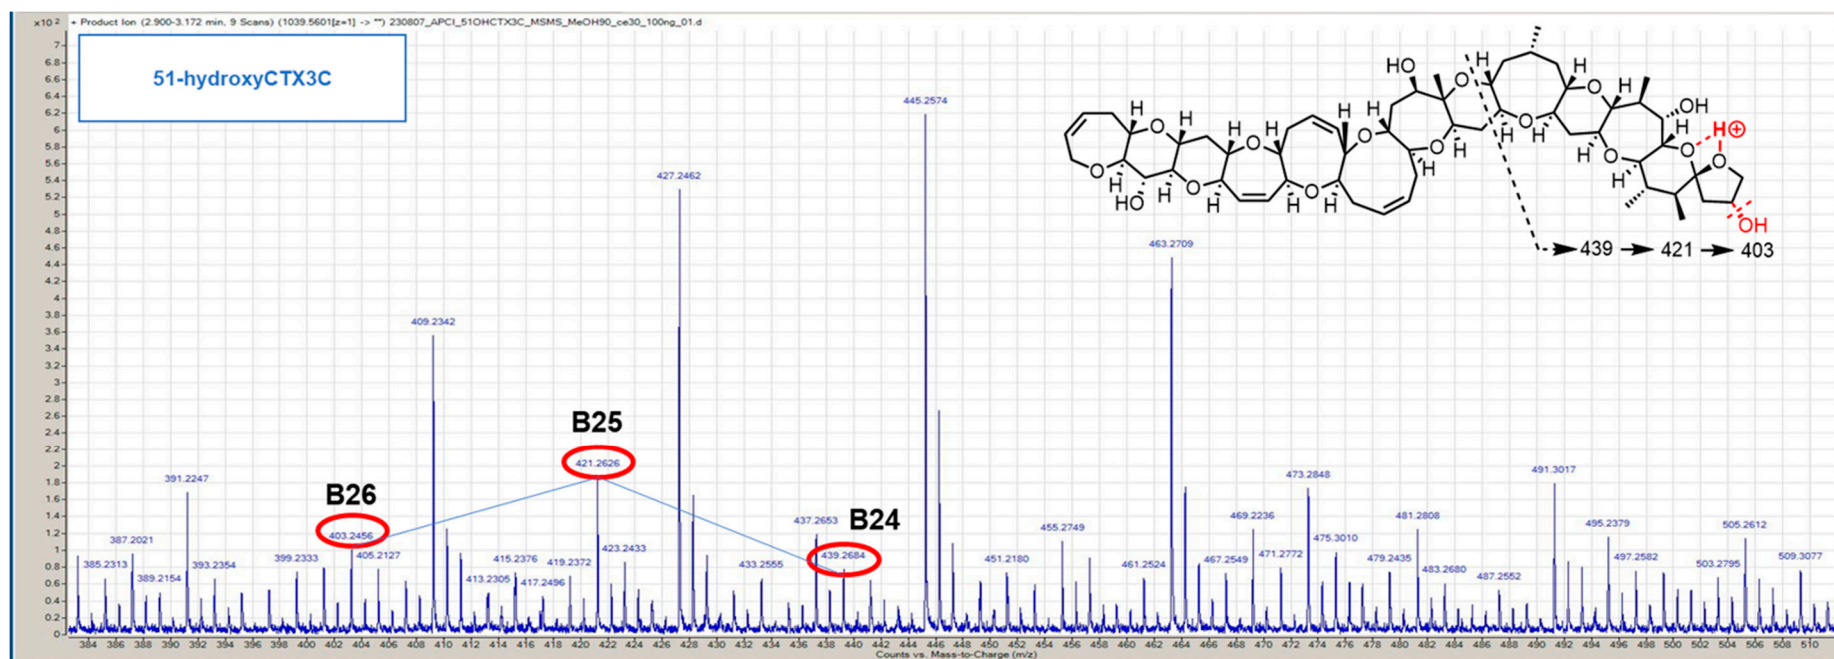

Figure S10. MS/MS product ion spectrum (7) of 51-hydroxy CTX3C  $[M+H]^+$  as a precursor ion.

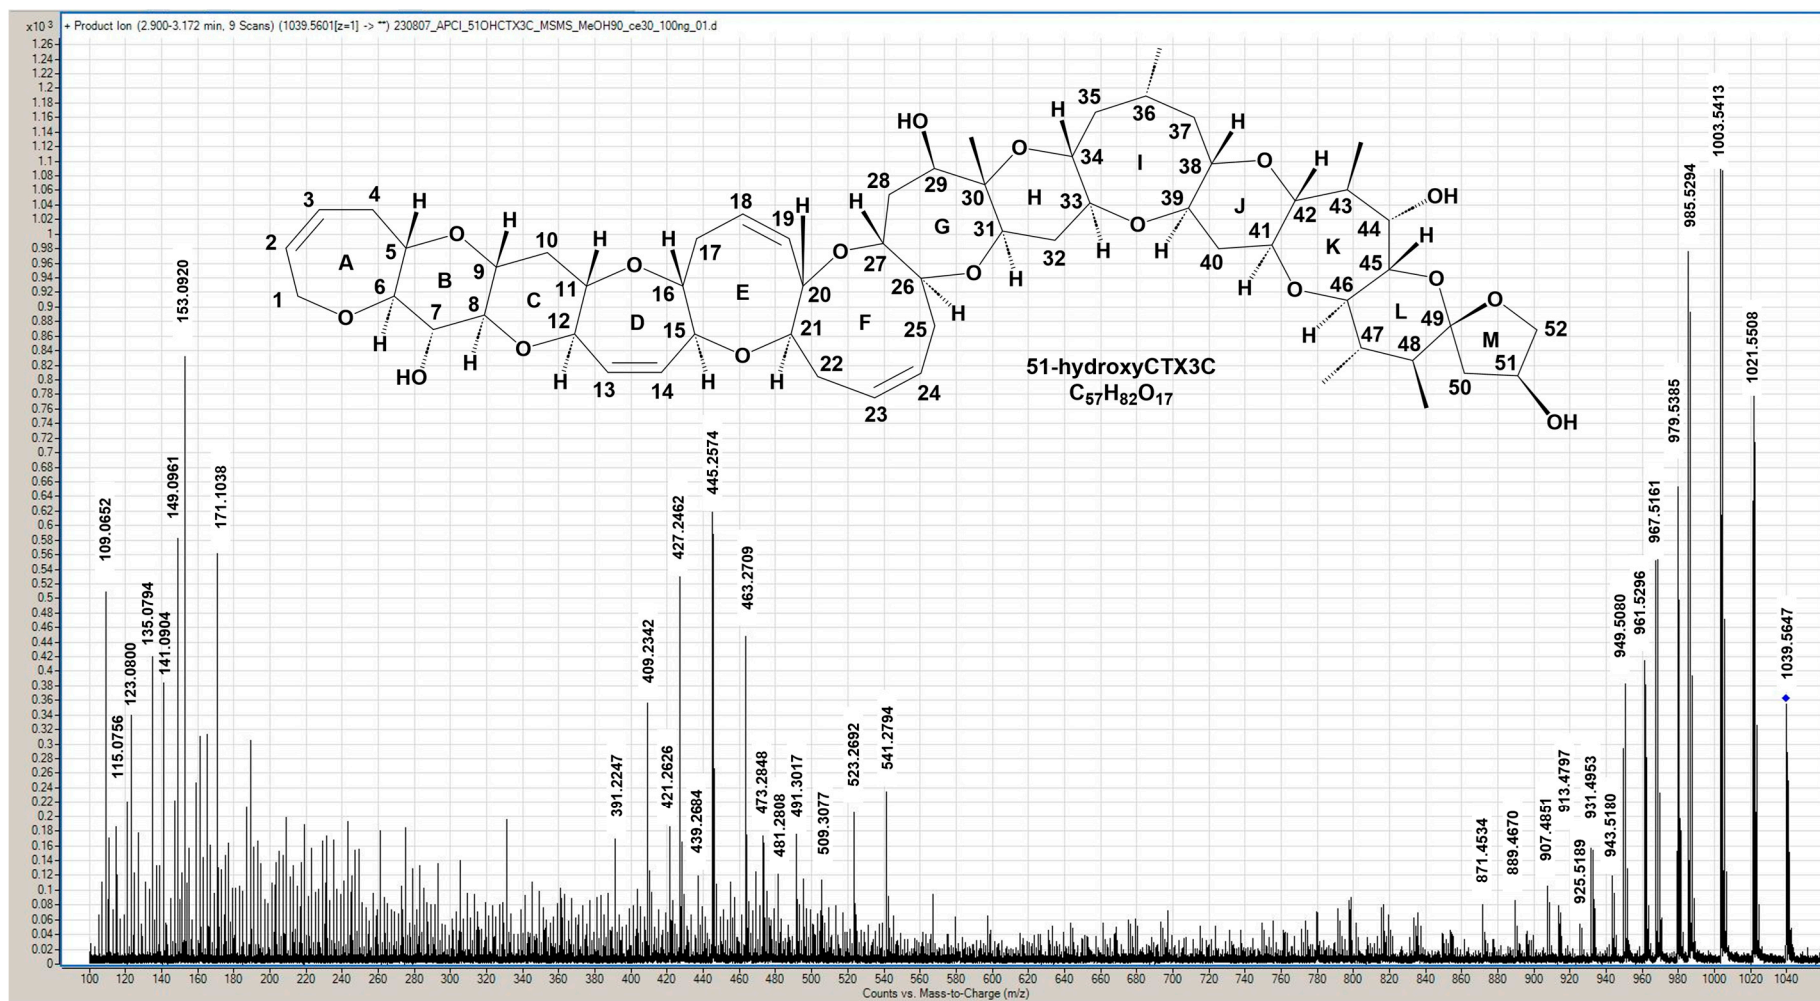

Figure S11. APCI-MS/MS product ion spectrum of 51-hydroxyCTX3C [M+H]<sup>+</sup> as a precursor ion. (Large size of full range MS/MS spectrum).
